# Supplementary material for: Comparison of a GH74 xyloglucanase and its CBM-deleted variant from Thielavia terrestris and their roles in xyloglucan-rich biomass degradation
Source: Research Square preprint supplement (doi:10.21203/rs.3.rs-1417417/v1), 2022-03-07

**Additional file 4**

**Fig. S4** Effect of temperature (a), methanol concentration (b), pH of medium (c) and induction time (d) on enzyme activity of *Tt*GH74 and expression levels shown on the gels.


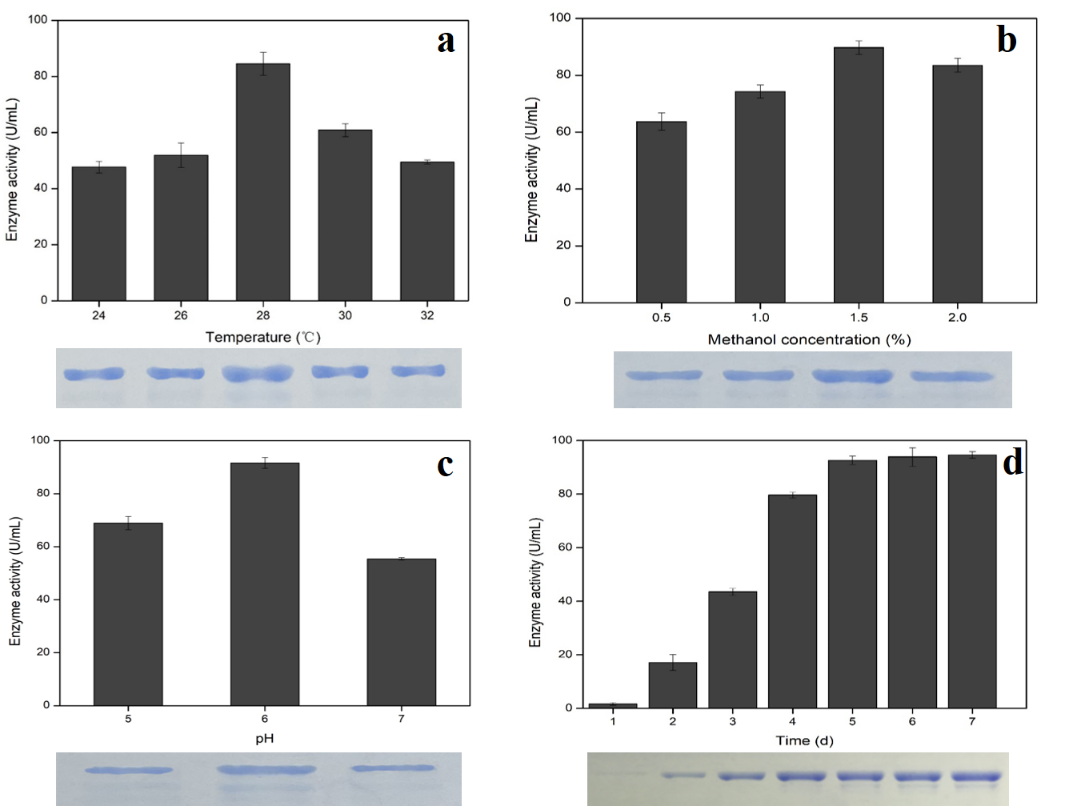

Supplement: Supplementary file 1 [file 1e12ab677a7c2cf8d9ffe9e8.docx]
