# Supplementary material for: Comparison of a GH74 xyloglucanase and its CBM-deleted variant from Thielavia terrestris and their roles in xyloglucan-rich biomass degradation
Source: Research Square preprint supplement (doi:10.21203/rs.3.rs-1417417/v1), 2022-03-07

**Additional file 3**

**Fig. S3** Three-dimensional structure of *Tt*GH74, a: the catalytic domain (CD) and b: family 1 carbohydrate binding module (CBM1). c: modularity of *Tt*GH74 and *Tt*GH74ΔCBM. SG, signal sequence; CD, catalytic domain module; CBM1, CBM1 module.


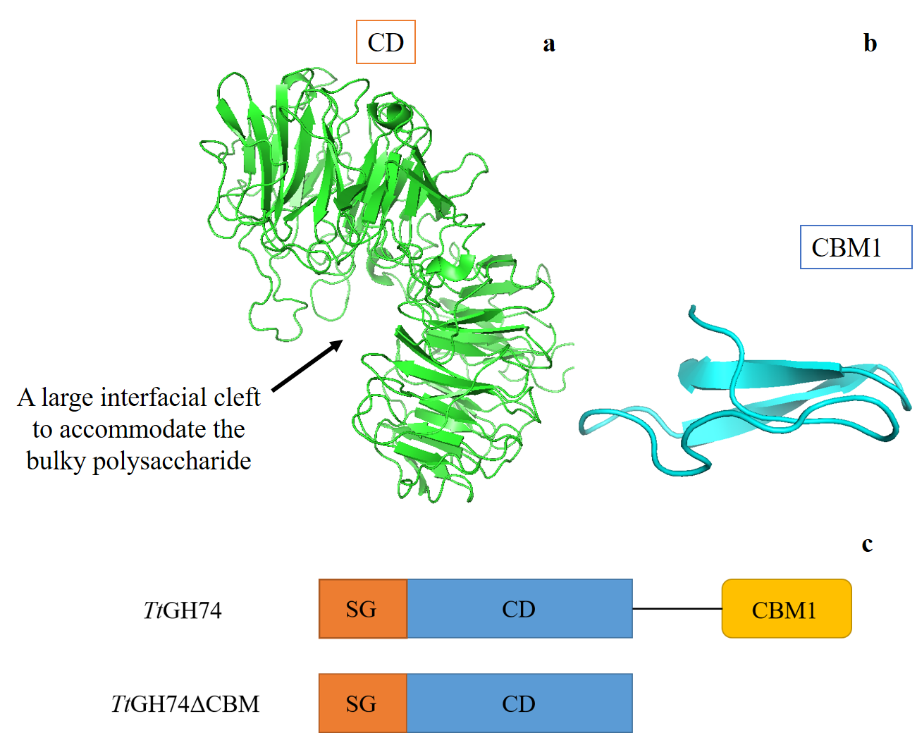

Supplement: Supplementary file 1 [file 4f72c945586a26fd52f35262.docx]
