# Supplementary material for: Comparison of a GH74 xyloglucanase and its CBM-deleted variant from Thielavia terrestris and their roles in xyloglucan-rich biomass degradation
Source: Research Square preprint supplement (doi:10.21203/rs.3.rs-1417417/v1), 2022-03-07
Supplement: Supplementary file 2 [file 5d1dd11ac1cc426f98271ff4.docx]

**Additional file 1**

**Fig. S1** Multiple sequence alignments between *Tt*GH74 and GH74 xyloglucanases from other fungal strains (*Trichoderma reesei* GH74 XP_006966240.1; *Coniochaeta ligniaria* GH74 OIW24422.1; *Coniochaeta* GH74 KAB5566692.1; *Trichoderma parareesei* GH74 OTA06671.1; *Neurospora crassa* GH74 XP_958569.1). Conserved tryptophan residues were indicated by yellow boxes.
