# Supplementary material for: Comparison of a GH74 xyloglucanase and its CBM-deleted variant from Thielavia terrestris and their roles in xyloglucan-rich biomass degradation
Source: Research Square preprint supplement (doi:10.21203/rs.3.rs-1417417/v1), 2022-03-07

**Additional file 5**

**Fig. S5** Effect of metals ions, NH4+ and EDTA (1 and 5 mM) on the *Tt*GH74 (a) and *Tt*GH74ΔCBM (b) activity.


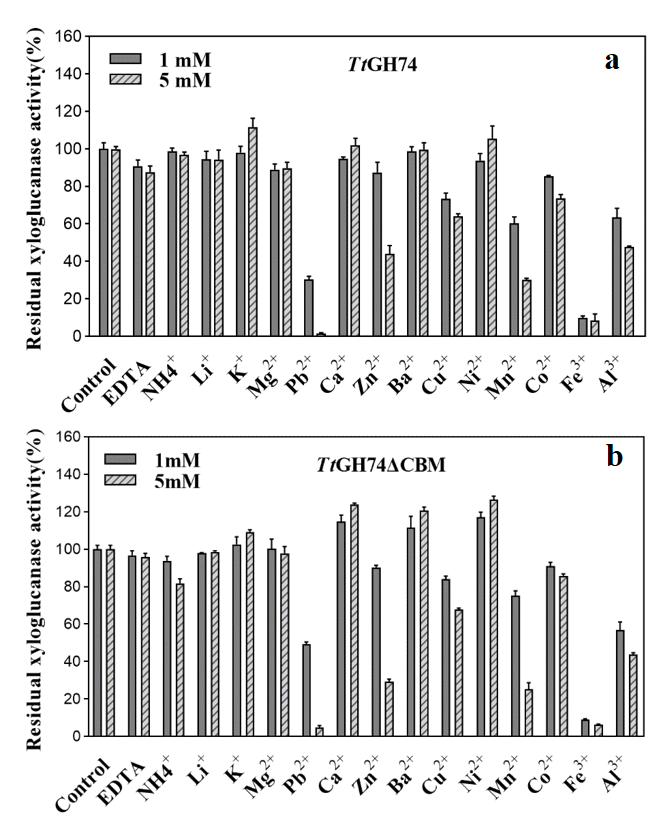

Supplement: Supplementary file 6 [file f722138f6b933d0dc089c84d.docx]
