# Supplementary material for: Comparison of a GH74 xyloglucanase and its CBM-deleted variant from Thielavia terrestris and their roles in xyloglucan-rich biomass degradation
Source: Research Square preprint supplement (doi:10.21203/rs.3.rs-1417417/v1), 2022-03-07

**Additional file 6**

**Fig. S6** HPAEC-PAD analysis of reaction products generated by *Tt*GH74 from alkali treated residues of sulfuric acid pretreated-corn bran (a), DES pretreated-corn bran (b) and DES pretreated-apple pomace (c).


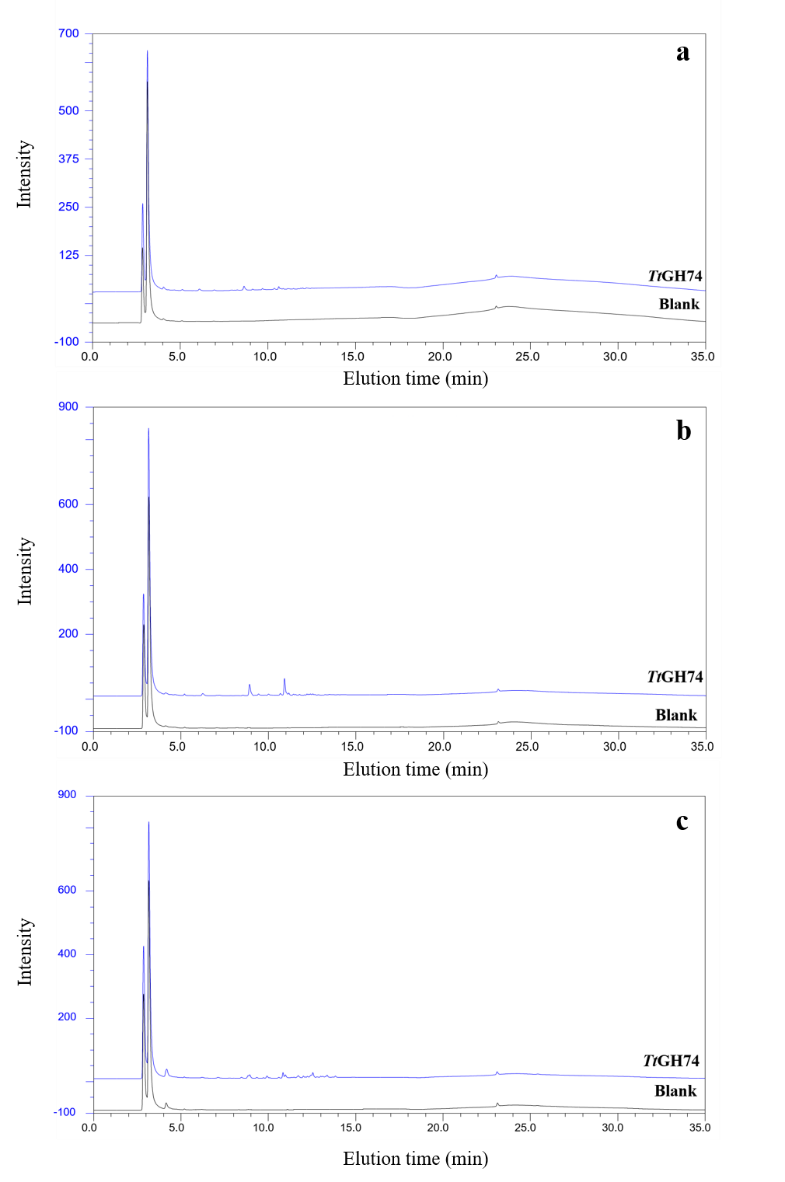

Supplement: Supplementary file 8 [file 51c294e098eea1492b95b239.docx]
