# Supplementary material for: Comparison of a GH74 xyloglucanase and its CBM-deleted variant from Thielavia terrestris and their roles in xyloglucan-rich biomass degradation
Source: Research Square preprint supplement (doi:10.21203/rs.3.rs-1417417/v1), 2022-03-07

**Additional file 2**

**Fig. S2** Phylogenetic tree of *Tt*GH74 amino acid sequences. Phylogenetic analysis of *Tt*GH74 with the GH74 xyloglucanases which from different source proteins. *Tt*GH74 marked with red box.


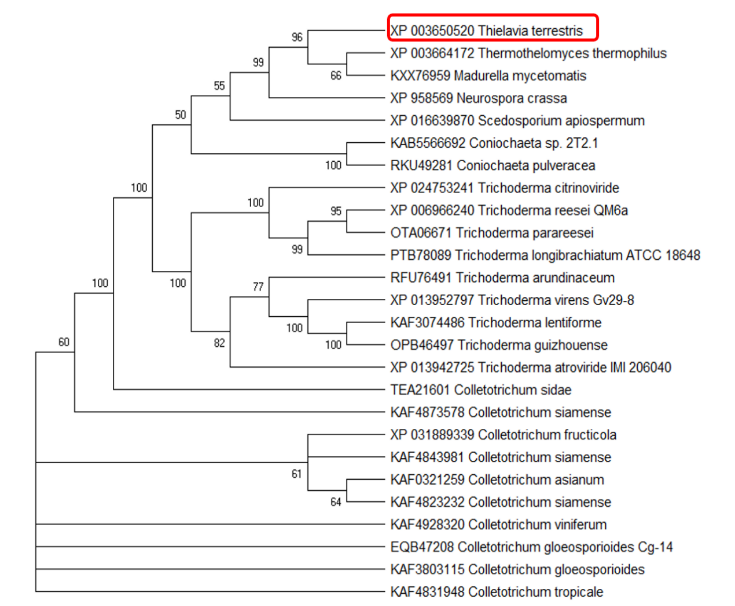

Supplement: Supplementary file 10 [file 8705f6ad8a80ff3e25e91718.docx]
